# Supplementary material for: Case Studies in the Assessment of Microbial Fitness: Seemingly Subtle Changes Can Have Major Effects on Phenotypic Outcomes
Source: PubMed Central journal article supplement (PMC10276084; doi:10.1007/s00239-022-10087-9), 2023-02-08

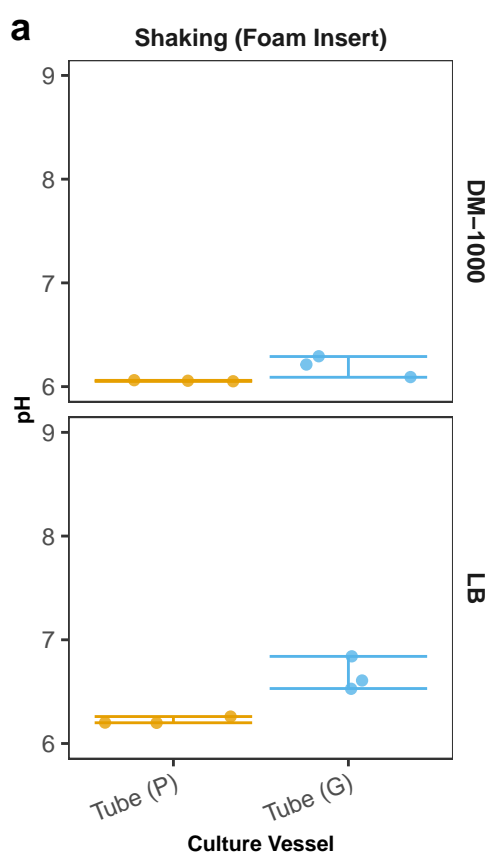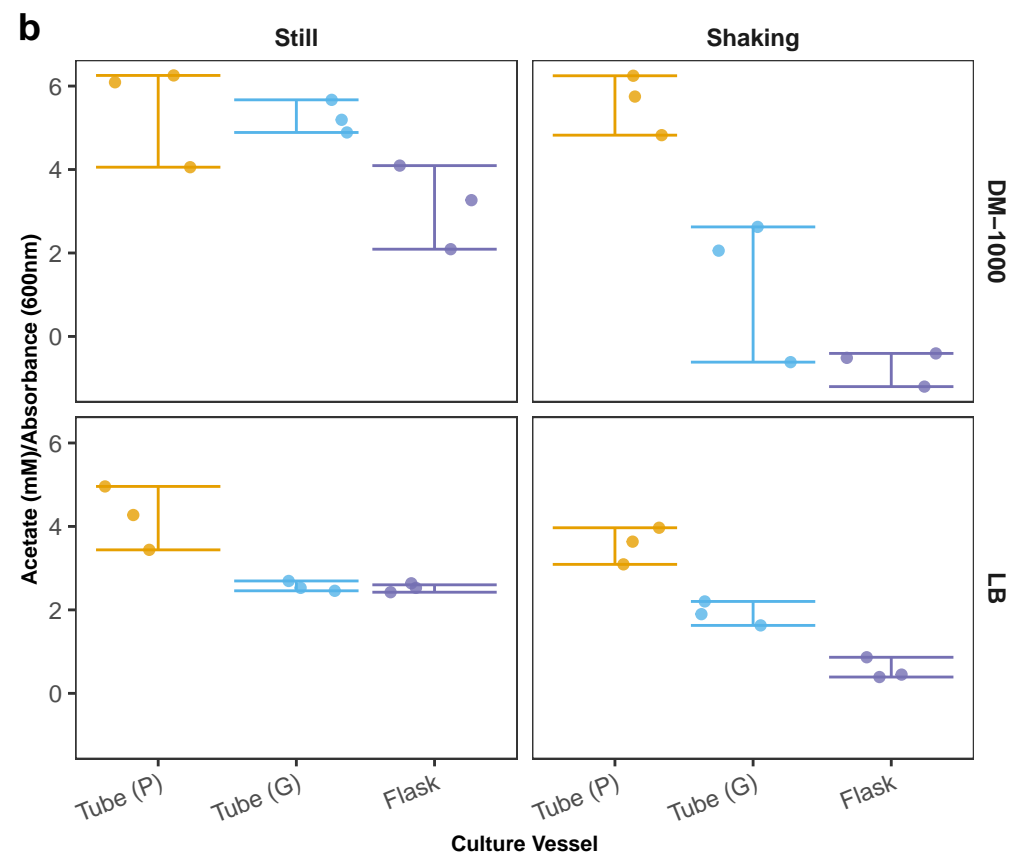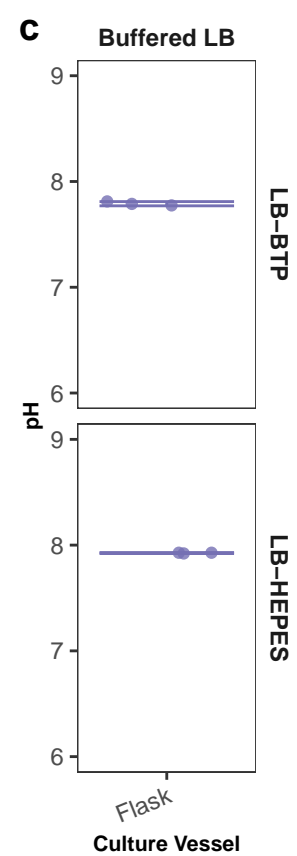

Supplement: 239_2022_10087_MOESM2_ESM.pdf [file 239_2022_10087_MOESM2_ESM.pdf]
